# Supplementary material for: Yeast mannoproteins are expected to be a novel potential functional food for attenuation of obesity and modulation of gut microbiota
Source: PubMed Central journal article supplement (PMC9614242; doi:10.3389/fnut.2022.1019344), 2022-10-14
Supplement: Data_Sheet_1.pdf [file Data_Sheet_1.pdf]

**Yeast mannoproteins is expected as a novel potential functional food for  
attenuation of obesity and modulation of gut microbiota**

Xiang Li,<sup>a</sup> Junsong Wu,<sup>b</sup> Yijun Kang,<sup>a</sup> Dan Chen,<sup>c</sup> Guijie Chen,<sup>c\*</sup>, Xiaoxiong Zeng,<sup>c\*</sup>

Jialian Wang<sup>a</sup>

<sup>a</sup>School of Marine and Biological Engineering, Yancheng Teachers' University,  
Yancheng, China

<sup>b</sup>Department of Basic Medical Science, Jiangsu Vocational College of Medicine,  
Yancheng 224005, Jiangsu, China,

<sup>c</sup>College of Food Science and Technology, Nanjing Agricultural University, Nanjing  
210095, Jiangsu, China

---

\* Corresponding authors. E-mail addresses: [guijiechen@njau.edu.cn](mailto:guijiechen@njau.edu.cn) (G. Chen), [zengxx@njau.edu.cn](mailto:zengxx@njau.edu.cn) (X. Zeng).

**Table S1. Primer sequences for RT-qPCR experiments**

| Gene          | Forward primer (5'-3') | Reverse primer (5'-3') |
|---------------|------------------------|------------------------|
| TNF- $\alpha$ | CTCATGCACCACCATCAAGG   | ACCTGACCACTCTCCCTTTG   |
| IL-1 $\beta$  | AGCTTCAAATCTCGCAGCAG   | TCTCCACAGCCACAATGAGT   |
| IL-6          | GACTGATGCTGGTGACAACC   | AGACAGGTCTGTTGGGAGTG   |
| GPR41         | CGACTAGAGATGGCTGTGGT   | AGAAGATGAGCAGTGTGGCT   |
| GPR43         | TCCAGCCTGGCTTTCCAATA   | GCCTGCAGGAGACATTCAG    |
| GAPDH         | GGACTTACAGAGGTCCGCTT   | CTATAGGGCCTGGGTCAGTG   |

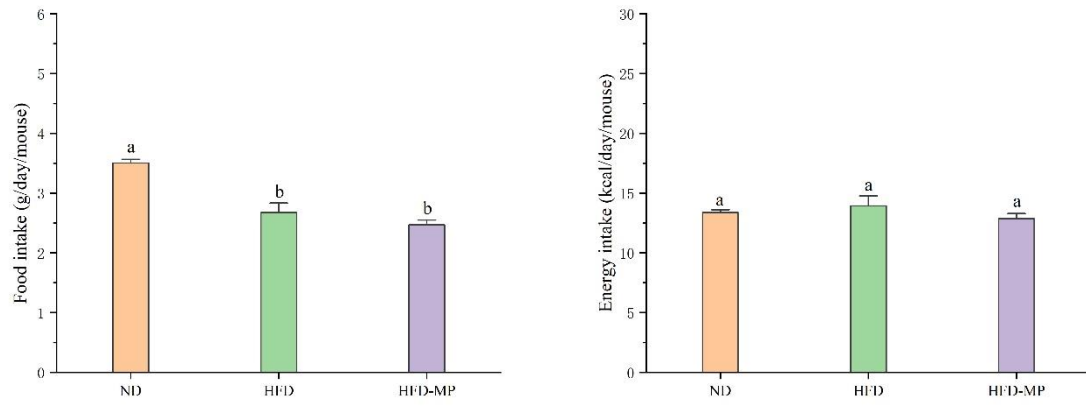

**Fig. S1.** Average food intake (a) and energy intake (b) per day of mice. The data were represented as the mean  $\pm$  SEM. Statistical differences were carried out by one-way ANOVA followed by Tuckey test,  $p < 0.05$  indicates significant.

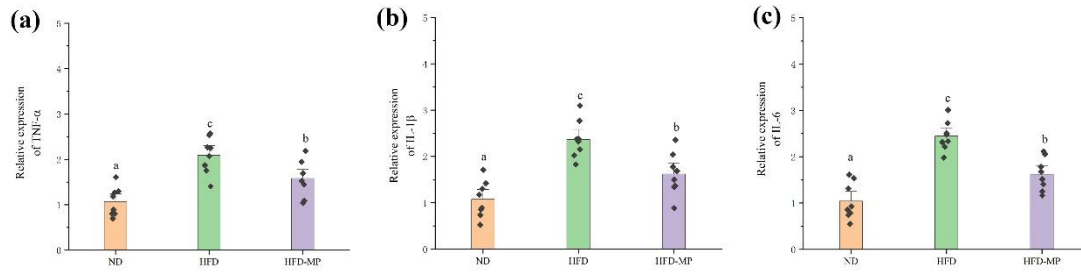

**Fig. S2.** The effect of MPs on the relative mRNA expression levels of TNF- $\alpha$  (a), IL-1 $\beta$  (b) and IL-6 (c) in liver. The data were represented as the mean  $\pm$  SEM. Statistical differences were carried out by one-way ANOVA followed by Tukey test,  $p < 0.05$  indicates significant.

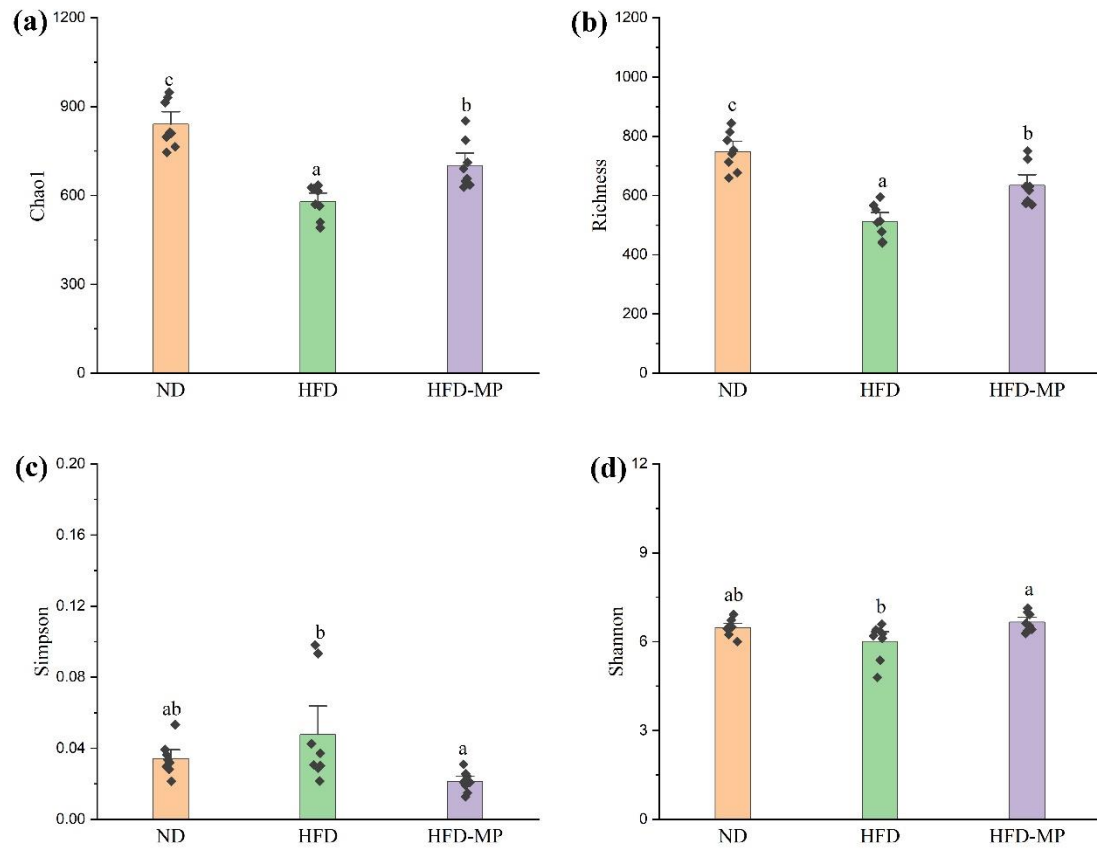

**Fig. S3.** Effect of MPs on the alpha diversity of gut microbiota, including (a) Chao1, (b) Richness, (c) Simpson and (d) Shannon indexes. The data were represented as the mean  $\pm$  SEM. Statistical differences were carried out by one-way ANOVA followed by Tukey test,  $p < 0.05$  indicates significant.

# Correlation Network

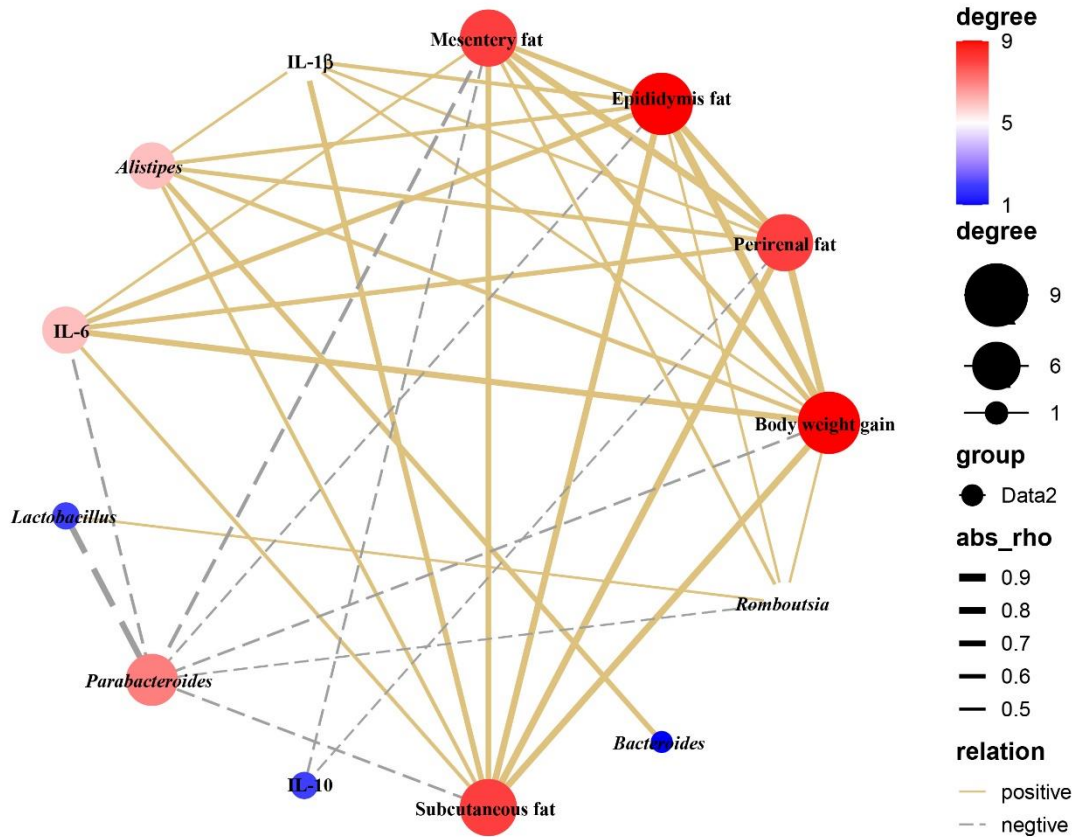

**Fig. S4.** Spearman's correlation between relative abundances of key gut microbiota at the genus level and features of obesity.

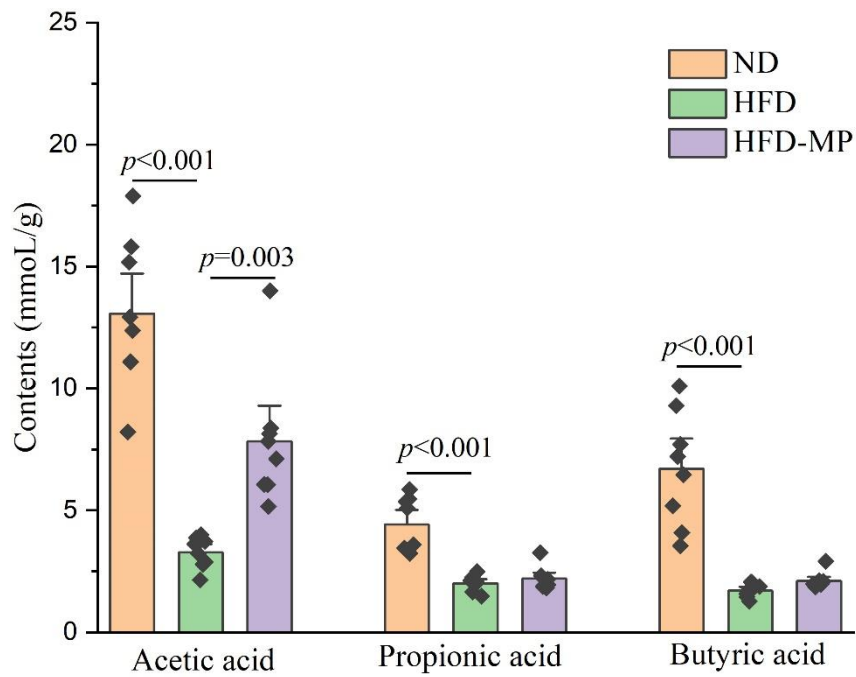

**Fig. S5.** The effect of MPs on the levels of SCFAs in mice cecal contents. The data were represented as the mean  $\pm$  SEM. Statistical differences were carried out by one-way ANOVA followed by Tuckey test,  $p < 0.05$  indicates significant.

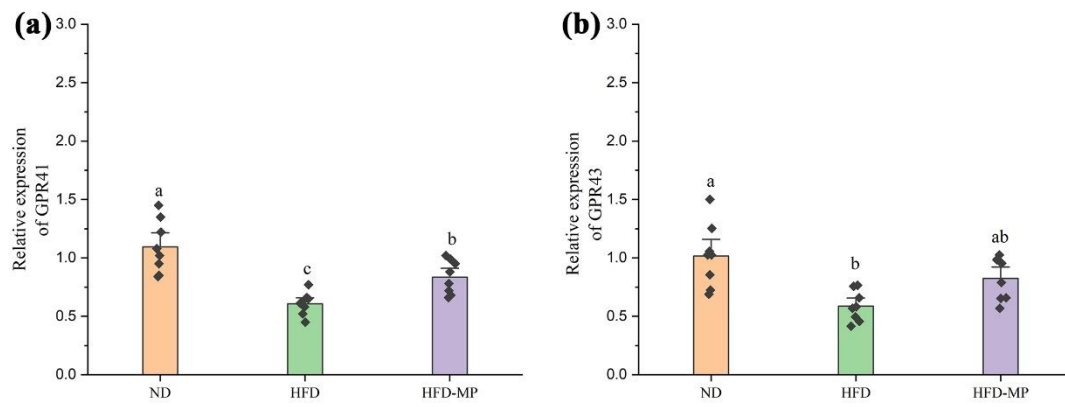

**Fig. S6.** The effect of MPs on the relative mRNA expression levels of GPR41 (a) and GPR43 (b). The data were represented as the mean  $\pm$  SEM. Statistical differences were carried out by one-way ANOVA followed by Tukey test,  $p < 0.05$  indicates significant.
